# Supplementary material
Source: PubMed Central journal article supplement (PMC6105524)
Supplement: NIHMS977801-supplement-Supp_figS1.pdf [file NIHMS977801-supplement-Supp_figS1.pdf]

**Supplementary Figure 1.**

**Time course curves of d5-18:3n-3 in human plasma total lipids**

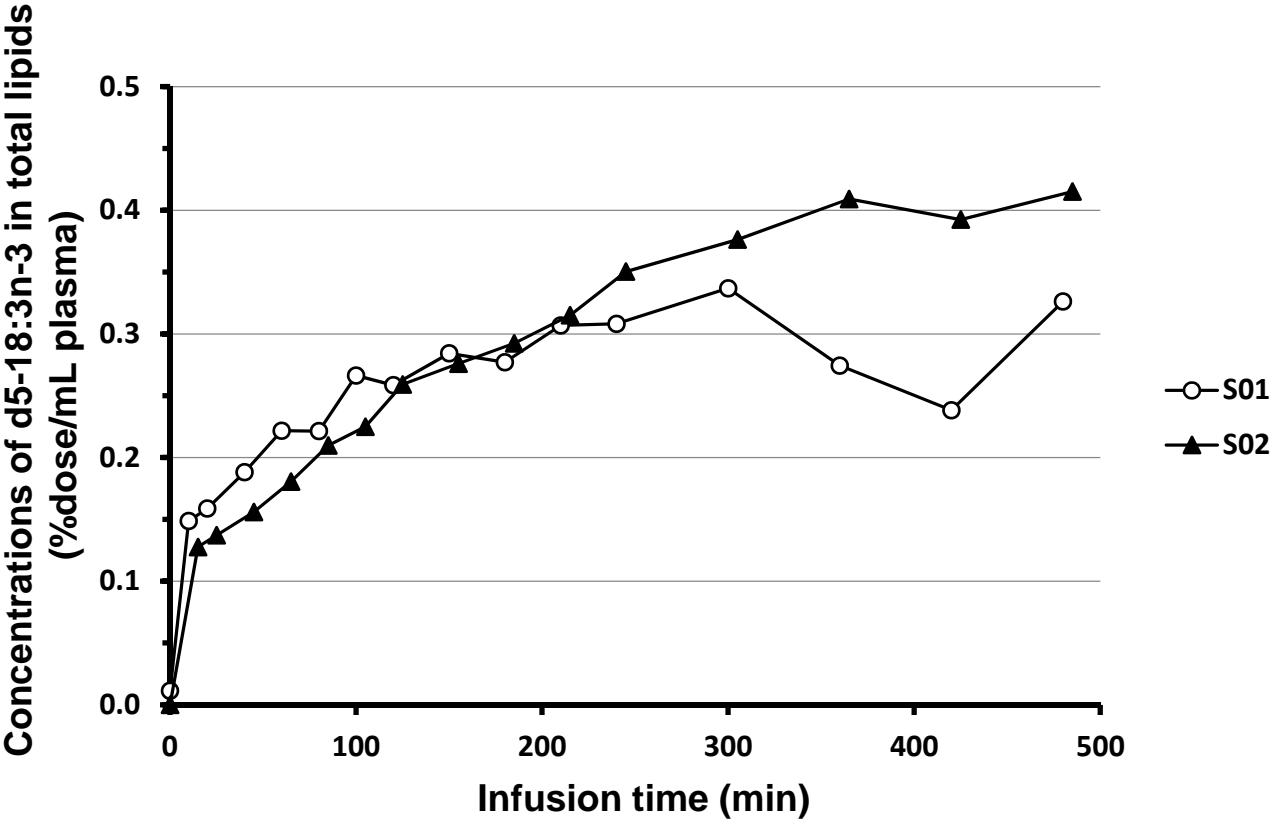

**Legend to Suppl. Figure 1.**

Time-course curves of concentrations of d5-18:3n-3 in plasma total lipids (%dose/mL) as a function of infusion time (min) for two subjects. The plasma total lipids were not further separated into lipid classes.
